# Supplementary material for: Long noncoding RNA expression profile reveals lncRNAs signature associated with extracellular matrix degradation in kashin-beck disease
Source: PubMed Central journal article supplement (PMC5730583; doi:10.1038/s41598-017-17875-0), 2017-12-14

**Long Noncoding RNA Expression Profile Reveals lncRNAs Signature Associated with Extracellular Matrix Degradation in Kashin-Beck Disease**

Cuiyan Wu<sup>1</sup>, Huan Liu<sup>1</sup>, Feng'e Zhang<sup>1</sup>, Wanzhen Shao<sup>1</sup>, Lei Yang<sup>1</sup>, Yujie Ning<sup>1</sup>, Sen Wang<sup>1</sup>, Guanghui Zhao<sup>2</sup>, Byeong Jae Lee<sup>3</sup>, Mikko Lammi<sup>4\*</sup>, Xiong Guo<sup>1\*</sup>

<sup>1</sup>. School of Public Health, Health Science Center of Xi'an Jiaotong University; Key Laboratory of Trace Elements and Endemic Diseases, National Health and Family Planning Commission of the People's Republic of China, Xi'an, 710061, P. R. China.

<sup>2</sup>. Department of Knee Joint, Xi'an Hong Hui Hospital, Xi'an, 710054, P. R. China.

<sup>3</sup>. Institute of Molecular Biology and Genetics, School of Biological Sciences, Seoul National University, Seoul, 151742, Korea.

<sup>4</sup>. Department of Integrative Medical Biology, Umeå University, Umeå 90187, Sweden.

\*Correspondence and requests for materials should be addressed to XiongGuo (email: [guox@mail.xjtu.edu.cn](mailto:guox@mail.xjtu.edu.cn)) and MikkoLammi (email: [mikko.lammi@umu.se](mailto:mikko.lammi@umu.se))

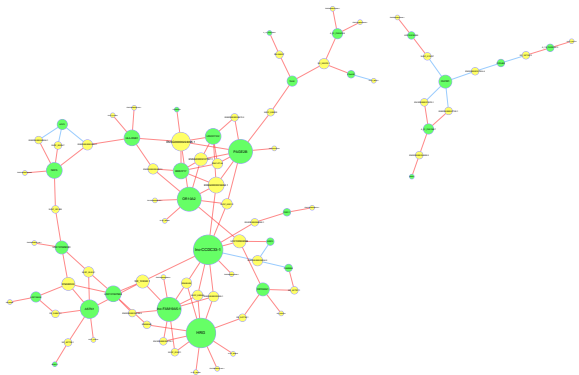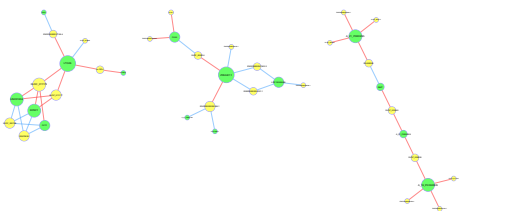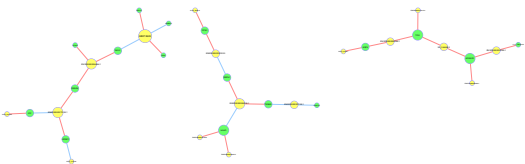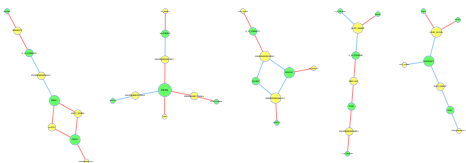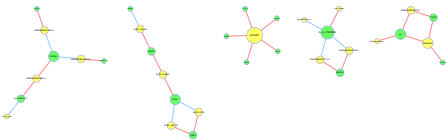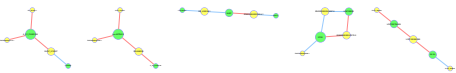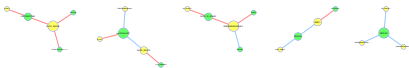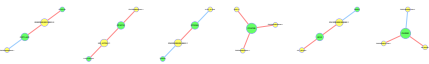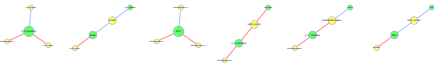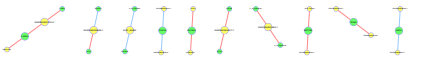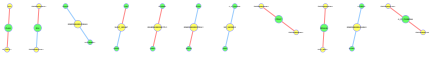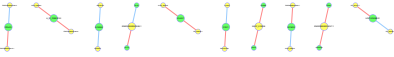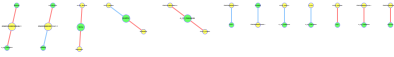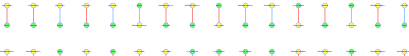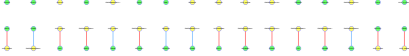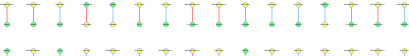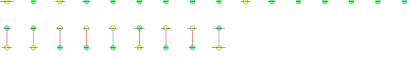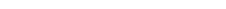

Supplement: 41598_2017_17875_MOESM2_ESM.pdf [file 41598_2017_17875_MOESM2_ESM.pdf]
