# Supplementary material for: Long noncoding RNA expression profile reveals lncRNAs signature associated with extracellular matrix degradation in kashin-beck disease
Source: PubMed Central journal article supplement (PMC5730583; doi:10.1038/s41598-017-17875-0), 2017-12-14
Supplement: 41598_2017_17875_MOESM1_ESM.pdf [file 41598_2017_17875_MOESM1_ESM.pdf]

**Long Noncoding RNA Expression Profile Reveals lncRNAs Signature Associated with  
Extracellular Matrix Degradation in Kashin-Beck Disease**

Cuiyan Wu<sup>1</sup>, Huan Liu<sup>1</sup>, Feng'e Zhang<sup>1</sup>, Wanzhen Shao<sup>1</sup>, Lei Yang<sup>1</sup>, Yujie Ning<sup>1</sup>, Sen Wang<sup>1</sup>,  
Guanghai Zhao<sup>2</sup>, Byeong Jae Lee<sup>3</sup>, Mikko Lammi<sup>4\*</sup>, Xiong Guo<sup>1\*</sup>

<sup>1</sup> School of Public Health, Health Science Center of Xi'an Jiaotong University; Key Laboratory of Trace Elements and Endemic Diseases, National Health and Family Planning Commission of the People's Republic of China, Xi'an, 710061, P. R. China.

<sup>2</sup> Department of Knee Joint, Xi'an Hong Hui Hospital, Xi'an, 710054, P. R. China.

<sup>3</sup> Institute of Molecular Biology and Genetics, School of Biological Sciences, Seoul National University, Seoul, 151742, Korea.

<sup>4</sup> Department of Integrative Medical Biology, Umeå University, Umeå 90187, Sweden.

\*Correspondence and requests for materials should be addressed to Xiong Guo (email: guox@mail.xjtu.edu.cn) and Mikko Lammi (email: mikko.lammi@umu.se)

## Supplementary Figures

(Note: The figure is too large to be clearly displayed here and it shows as a single PDF file.)

**Figure S1. The co-expressed correlation between lncRNAs and mRNAs in KBD was revealed by CNC network.** The yellow spots represent lncRNAs and the green spots represent mRNAs. The size of the circles represents the relative importance of the genes in the network. Red lines show a positive interaction between transcripts and blue lines show a negative interaction.

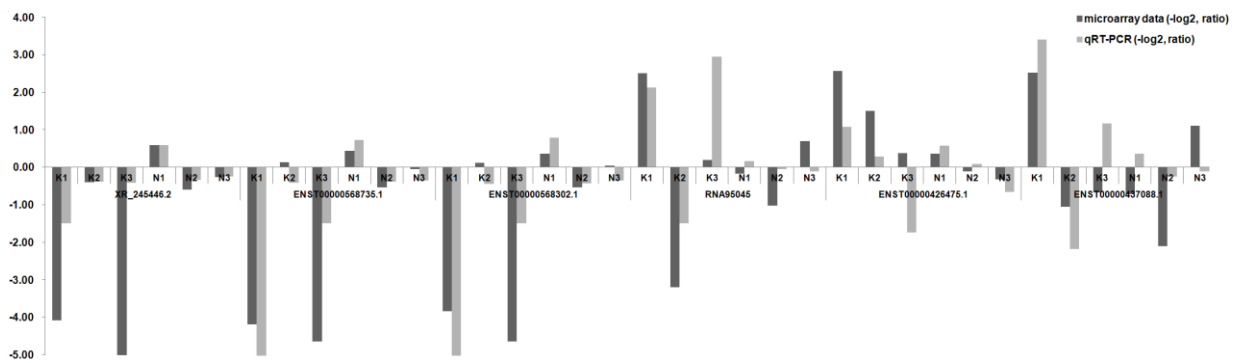

**Figure S2. Validation of lncRNAs microarray data by qRT-PCR.** The relative expression level of each lncRNA was normalized to GAPDH.

## Supplementary Tables

**Table S1. Primers used in qRT-PCR.**

| <b>LncRNA ID</b>     | <b>Forward</b>                | <b>Reverse</b>            |
|----------------------|-------------------------------|---------------------------|
| XR_245446.2          | TCCTTTTGTGGTAAATGCTT<br>ATTCT | AGGGAGGGAACAGCCT<br>ACAT  |
| ENST00000568735.1    | AATTGTACCTTTCCCGGCCA          | TAGAATATGCCTGGCGG<br>CTG  |
| ENST00000568302.1    | TTCCCGGCCAAGAAACCTC           | GTGACTTCTTTAGCTGG<br>CGG  |
| RNA95045 RNS_127_194 | ATGGGTCTGCCCTTGAGTT           | TGTGAACGGAACCCAC<br>TGC   |
| ENST00000426475.1    | AATGCAGCCATTTGTCACC<br>C      | GCAGCAAAGCTGAAG<br>TGCTAA |
| ENST00000437088.1    | GGTAGAAGCTGCTGTCCCT<br>TAG    | GCTGAGAAATCTCATGC<br>CTGC |

**Table S2. Coding-non-coding networks pairs.**

| <b>LncRNA Source</b>     | <b>Target</b>          | <b>Target Gene Symbol</b> | <b>Correlation</b> | <b>P-value</b> |
|--------------------------|------------------------|---------------------------|--------------------|----------------|
| <i>ENST00000531202.1</i> | NM_022053              | NXF2                      | 0.996639665        | 1.25E-06       |
| TCONS_00015374           | ENST00000511867        | ---                       | 0.997394017        | 6.65E-07       |
| TCONS_00016355           | <i>NM_001290030</i>    | ERICH2                    | -0.990230209       | 1.80E-05       |
| TCONS_00016355           | <i>NM_001394</i>       | DUSP4                     | -0.991685676       | 1.21E-05       |
| TCONS_00016355           | ENST00000511867        | ---                       | 0.992357415        | 9.77E-06       |
| ENST00000511029.1        | <i>ENST00000607810</i> | LOC100506885              | -0.991083246       | 1.44E-05       |
| TCONS_00018333           | NM_001040103           | OPALIN                    | 0.990295126        | 1.77E-05       |
| ENST00000568735.1        | ENST00000416507        | ---                       | 0.997673597        | 5.01E-07       |
| ENST00000422971.1        | XR_172388              | LOC100506737              | 0.993139299        | 7.46E-06       |
| <i>ENST00000437088.1</i> | <i>NM_001012642</i>    | GRAMD2                    | 0.990117784        | 1.85E-05       |

The genes lncRNAs written in *italics* have up-regulated expression in KBD, while those written in normal font show the down-regulated gene expression.

**Table S3. The GO terms and input genes associated with extracellular matrix**

| GO accession | Term                                                    | P value  | Input gene symbols                                                                                                                                                                                                                                                                                                                                    |
|--------------|---------------------------------------------------------|----------|-------------------------------------------------------------------------------------------------------------------------------------------------------------------------------------------------------------------------------------------------------------------------------------------------------------------------------------------------------|
| GO:0005578   | proteinaceous<br>extracellular<br>matrix*               | 8.66e-08 | <i>ADAMTS9</i> , <i>PODNLI</i> , <i>COL11A1</i> , NID2,<br>LAMA1, <i>COL8A2</i> , FBLN1, AMTN, FBLN2,<br><i>KALI</i> , EGFLAM, NAV2, <i>OGN</i> , ECM1,<br><i>SMOC2</i> , WNT6, MMP1, LAMA4, CD248,<br><i>ADAMTSL3</i> , MFAP2, MAMDC2, COL4A5,<br>COL14A1, <i>ECM2</i> , SERPINF1, <i>OMD</i> , WISP2,<br><i>ASPN</i>                                |
| GO:0031012   | extracellular<br>matrix*                                | 1.31e-07 | <i>ADAMTS9</i> , <i>PODNLI</i> , <i>COL11A1</i> , NID2,<br>LAMA1, <i>COL8A2</i> , FBLN1, AMTN, AEBP1,<br>FBLN2, <i>KALI</i> , EGFLAM, NAV2, <i>OGN</i> ,<br>RARRES2, ECM1, <i>SMOC2</i> , WNT6, MMP1,<br>LAMA4, CD248, <i>ADAMTSL3</i> , MFAP2,<br><i>PCSK6</i> , MAMDC2, COL4A5, COL14A1,<br><i>ECM2</i> , SERPINF1, <i>OMD</i> , WISP2, <i>ASPN</i> |
| GO:0005614   | interstitial<br>matrix*                                 | 9.95e-06 | EGFLAM, COL14A1, <i>ECM2</i> , NAV2, <i>SMOC2</i> ,<br>MAMDC2                                                                                                                                                                                                                                                                                         |
| GO:0044420   | extracellular<br>matrix<br>component*                   | 5.94e-05 | COL4A5, <i>COL11A1</i> , EGFLAM, LAMA4,<br>NID2, <i>COL8A2</i> , LAMA1, COL14A1, FBLN1,<br>AMTN, MFAP2, <i>SMOC2</i> , SERPINF1                                                                                                                                                                                                                       |
| GO:0043062   | extracellular<br>structure<br>organization <sup>#</sup> | 1.16e-04 | <i>SMOC2</i> , <i>COL11A1</i> , NID2, LAMA1, FBLN1,<br>ITGA7, FBLN2, PRSS1, EGFLAM, <i>COL8A2</i> ,<br>MMP1, LAMA4, <i>RGCC</i> , MFAP2, <i>LRP4</i> ,<br>COL4A5, DPP4, COL14A1, <i>ECM2</i> , HAS1,<br>SPP1, <i>CPB2</i> , <i>MPZL3</i> , CTSK                                                                                                       |
| GO:0030198   | extracellular<br>matrix<br>organization <sup>#</sup>    | 1.11e-04 | The same as upper row                                                                                                                                                                                                                                                                                                                                 |

The genes written in *italics* have up-regulated expression in KBD, while those written in normal font show the down-regulated gene expression. \* cellular component; # biological process.
